# Supplementary material for: Using Gene Essentiality and Synthetic Lethality Information to Correct Yeast and CHO Cell Genome-Scale Models
Source: MDPI journal article supplement (doi:10.3390/metabo5040536), 2015-09-29
Supplement: s1 [file s1]

## Supplemental File 4: Supplementary *in silico* and *in vivo* information on Yeast 7.11 and CHO 1.2

**Table 1.** Model modifications from Yeast 7.00 to Yeast 7.11 as reported in sourceforge.net

| Model modifications with reaction IDs of Yeast 7.11                                                                                                                            | References (if any)                                                                     |
|--------------------------------------------------------------------------------------------------------------------------------------------------------------------------------|-----------------------------------------------------------------------------------------|
| <ul style="list-style-type: none"> <li>Aspartate transport r_1117 can only flow in cytoplasm to mitochondria direction, to avoid free generation of proton gradient</li> </ul> | Reported by Hnin Aung                                                                   |
| <ul style="list-style-type: none"> <li>Malic enzyme r_0718 is NADP-dependent, not NAD<sup>+</sup></li> </ul>                                                                   | [1], [2], [3]                                                                           |
| <ul style="list-style-type: none"> <li>NADH: ubiquinone oxidoreductase r_0773 is not proton translocating</li> </ul>                                                           | [4], [5]                                                                                |
| <ul style="list-style-type: none"> <li>ATP synthase r_0226 moves 4 cytoplasmic protons</li> </ul>                                                                              | NA                                                                                      |
| <ul style="list-style-type: none"> <li>Allow proton leak r_2129 from cytoplasm to mitochondrion</li> </ul>                                                                     | NA                                                                                      |
| <ul style="list-style-type: none"> <li>Mitochondrial ADP/ATP transporter r_1110 does not cotransport protons</li> </ul>                                                        | [6], [7]                                                                                |
| <ul style="list-style-type: none"> <li>Zymesterol intermediate 1c reactions r_0234, r_0240</li> </ul>                                                                          | [8]                                                                                     |
| <ul style="list-style-type: none"> <li>GDH2 irreversible</li> </ul>                                                                                                            | NA                                                                                      |
| <ul style="list-style-type: none"> <li>Remove citrate isomerase r_0303</li> </ul>                                                                                              | NA                                                                                      |
| <ul style="list-style-type: none"> <li>Dihydroorotic acid dehydrogenase r_0453 uses only fumarate as electron donor: Remove r_0338, r_0339, r_2127</li> </ul>                  | NA                                                                                      |
| <ul style="list-style-type: none"> <li>Pyruvate can be transported r_1254 out of the cell</li> </ul>                                                                           | [9]                                                                                     |
| <ul style="list-style-type: none"> <li>Folic acid is changed to Folate</li> </ul>                                                                                              | NA                                                                                      |
| <ul style="list-style-type: none"> <li>Heme O monooxygenase r_0530 associated with genes (YPL252C AND YDR376W) or (YPL252C AND YDR376W AND YER141W)</li> </ul>                 | NA                                                                                      |
| <ul style="list-style-type: none"> <li>Add chitin and heme a to biomass definition r_4041 with minimal stoichiometry (10<sup>-6</sup>)</li> </ul>                              | NA                                                                                      |
| <ul style="list-style-type: none"> <li>Allow potassium exchange r_2020 from medium</li> </ul>                                                                                  | NA                                                                                      |
| <ul style="list-style-type: none"> <li>Extracellular reaction raffinose -&gt; fructose + melibiose is catalysed by gene SUC2</li> </ul>                                        | [10]                                                                                    |
| <ul style="list-style-type: none"> <li>PHM8 is a 5'-nucleotidase for CMP r_0076, GMP r_1619 and UMP r_0078</li> </ul>                                                          | [11]                                                                                    |
| <ul style="list-style-type: none"> <li>PNP1 phosphorylase activity specific to inosine and guanosine</li> </ul>                                                                | [11]                                                                                    |
| <ul style="list-style-type: none"> <li>URH1 hydrolase activity specific to uridine</li> </ul>                                                                                  | [11]                                                                                    |
| <ul style="list-style-type: none"> <li>PGM3 is a phosphoribomutase r_0907, not a phosphoglucomutase r_0888</li> </ul>                                                          | [11]                                                                                    |
| <ul style="list-style-type: none"> <li>Metabolite formula, charge and number of carbon atoms added to SBML</li> </ul>                                                          | Contributors: Hnin Aung, Kevin Correia, Ben Heavner, Kieran Smallbone, Balázs Szappanos |

**Table 2.** Single gene deletion data sets; one showing *in silico* essential genes, which have been verified *in vivo* and the other showing the ones which are not *in vivo* essentials

| Experimentally<br>verified list | <i>in silico</i> essential<br>but non- essential<br><i>in vivo</i> | Experimentally<br>verified list | <i>in silico</i> essential<br>but non- essential<br><i>in vivo</i> | Experimentally<br>verified list | <i>in silico</i> essential<br>but non- essential<br><i>in vivo</i> |
|---------------------------------|--------------------------------------------------------------------|---------------------------------|--------------------------------------------------------------------|---------------------------------|--------------------------------------------------------------------|
| YAR015W                         | YBL076C                                                            | YEL058W                         | YHR208W                                                            | YGL245W                         |                                                                    |
| YBL033C                         | YBR115C                                                            | YER003C                         | YJL167W                                                            | YGR060W                         |                                                                    |
| YCL018W                         | YBR153W                                                            | YER014W                         | YJR148W                                                            | YGR264C                         |                                                                    |
| YDL055C                         | YBR166C                                                            | YER052C                         | YLL018C                                                            | YHR007C                         |                                                                    |
| YDL103C                         | YBR248C                                                            | YER055C                         | YLR060W                                                            | YHR019C                         |                                                                    |
| YDL141W                         | YBR256C                                                            | YER090W                         | YLR359W                                                            | YHR025W                         |                                                                    |
| YDL205C                         | YBR265W                                                            | YFR025C                         | YLR420W                                                            | YHR072W                         |                                                                    |
| YDR007W                         | YCL030C                                                            | YGL001C                         | YMR062C                                                            | YIL116W                         |                                                                    |
| YDR037W                         | YDR044W                                                            | YGL009C                         | YMR300C                                                            | YIR034C                         |                                                                    |
| YDR047W                         | YDR226W                                                            | YGL148W                         | YMR319C                                                            | YJL088W                         |                                                                    |
| YDR234W                         | YER023W                                                            | YGL154C                         | YNL277W                                                            | YJL130C                         |                                                                    |
| YDR487C                         | YFL017C                                                            | YGL234W                         | YOL143C                                                            | YJR139C                         |                                                                    |
| YKL104C                         | YFL022C                                                            | YOR095C                         | YOR130C                                                            | YOR335C                         |                                                                    |
| YKL211C                         | YFL045C                                                            | YOR128C                         | YGL055W                                                            | YPL160W                         |                                                                    |
| YKL216W                         | YGR185C                                                            | YOR168W                         | YPL252C                                                            | YPL172C                         |                                                                    |

YLR100W

YOR176W

YPR033C

YLR304C

YOR236W

YPR035W

YLR355C

YOR278W

YPR060C

YMR220W

YPR183W

YNL220W

YPL231W

YNL280C

YLR303W

YNR016C

YGR204W

YMR202W

YBR126C

YMR217W

YDR074W

YNR050C

YJR109C

YOL140W

YOR303W

YOR074C

YPR167C

---

**Table 3.** Double gene deletion data sets; one showing *in silico* SL gene pairs, which have been verified *in vivo* and the other showing the ones which have not been tested *in vivo*

| Experimentally verified list | <i>in silico</i> predictions not tested <i>in vivo</i> |
|------------------------------|--------------------------------------------------------|
| YBR117C, YPR074C             | YAL054C, YLR153C                                       |
| YBR249C, YDR035W             | YBR294W, YLR092W                                       |
| YGL125W, YPL023C             | YDL131W, YDL182W                                       |
| YGR143W, YPR159W             | YML106W, YMR271C                                       |
| YGR209C, YLR043C             | YOR222W, YPL134C                                       |
| YGL202W, YHR137W             | YBR121C, YPR081C                                       |
| YJL121C, YNL241C             | YDR035W, YKL029C                                       |
| YBL039C, YJR103W             | YCL050C, YJR010W                                       |
| YKL181W, YOL061W             | YMR170C, YPL061W                                       |
| YDR502C, YLR180W             | YDR300C, YLR438W                                       |
| YGR032W, YLR342W             | YBR291C, YKL029C                                       |
| YCR034W, YLR372W             | YNL104C, YOR108W                                       |
| YLR450W, YML075C             |                                                        |
| YLR028C, YMR120C             |                                                        |
| YGR124W, YPR145W             |                                                        |

**Table 4.** Higher order gene deletion data sets; one showing *in silico* SL gene sets, which have been verified *in vivo* and the other showing the ones which have not been tested *in vivo*

|                | Experimentally verified list | <i>in silico</i> predictions not tested <i>in vivo</i> |
|----------------|------------------------------|--------------------------------------------------------|
| SL Triplets    | YER099C, YHL011C, YBL068W    | YCL040W, YFR053C, YGL253W                              |
|                | YDL095W, YAL023C, YJR143C    | YHR216W, YLR432W, YML056C                              |
|                |                              | YGR254W, YHR174W, YKR097W                              |
|                |                              | YAL062W, YDL171C, YOR375C                              |
|                |                              | YDR497C, YJL153C, YOL103W                              |
| SL Quadruplets | No information               | YDR287W, YDR497C, YHR046C, YOL103W                     |
|                | No information               | YEL046C, YGR087C, YLR044C, YLR134W                     |

**Table 5.** List of essential genes for the CHO 1.2 model along with auxotrophy information

| Gene          | Auxotrophy                                                                                                                                  | Gene          | Auxotrophy                                         |
|---------------|---------------------------------------------------------------------------------------------------------------------------------------------|---------------|----------------------------------------------------|
| <i>acaCb</i>  | sphingomyelin                                                                                                                               | <i>lysXt</i>  | L-lysine                                           |
| <i>acsL1</i>  | sphingomyelin                                                                                                                               | <i>metXt</i>  | L-methionine                                       |
| <i>acsL2</i>  | sphingomyelin                                                                                                                               | <i>mthFr</i>  | 5-Methyltetrahydrofolate                           |
| <i>acsL3</i>  | sphingomyelin                                                                                                                               | <i>mvd</i>    | cholesterol                                        |
| <i>acsL4</i>  | sphingomyelin                                                                                                                               | <i>mvk</i>    | cholesterol                                        |
| <i>akrLa4</i> | sphingomyelin                                                                                                                               | <i>nadS</i>   | NAD <sup>+</sup>                                   |
| <i>aldOa1</i> | phosphatidylglycerol<br>phosphatidylserine<br>phosphatidylethanolamine<br>phosphatidylcholine<br>cardiolipin<br>1Phosphatidyl-D-myoinositol | <i>nmnAt</i>  | NAD <sup>+</sup> , NADH, NADP <sup>+</sup>         |
| <i>arg1</i>   | spermidine<br>putrescine                                                                                                                    | <i>odc1</i>   | Spermidine<br>putrescine                           |
| <i>argXt</i>  | L-arginine<br>spermidine<br>putrescine                                                                                                      | <i>otrA41</i> | spermidine                                         |
| <i>cds1</i>   | L-arginine<br>spermidine<br>putrescine                                                                                                      | <i>pinS</i>   | 1Phosphatidyl-D-myoinositol                        |
| <i>crIS1</i>  | phosphatidylglycerol<br>1Phosphatidyl-D-myoinositol<br>cardiolipin                                                                          | <i>pisD</i>   | phosphotidylethanolamine                           |
| <i>fasN</i>   | cholesterol                                                                                                                                 | <i>pmvK</i>   | cholesterol                                        |
| <i>ffa10</i>  | cholesterol                                                                                                                                 | <i>qprT</i>   | NAD <sup>+</sup> , NADH, NADP <sup>+</sup> , NADPH |
| <i>ffa11</i>  | cholesterol                                                                                                                                 | <i>sgmS1</i>  | glycogen                                           |
| <i>ffa12</i>  | cholesterol                                                                                                                                 | <i>sptLc1</i> | sphingomyelin                                      |
| <i>ffa7</i>   | cholesterol                                                                                                                                 | <i>sptLc2</i> | sphingomyelin                                      |
| <i>ffa9</i>   | cholesterol                                                                                                                                 | <i>sptLc3</i> | sphingomyelin                                      |
| <i>fvt1</i>   | sphingomyelin                                                                                                                               | <i>sqlE</i>   | cholesterol                                        |
| <i>ggpS1</i>  | cholesterol                                                                                                                                 | <i>srm</i>    | spermidine                                         |
| <i>gys1</i>   | glycogen                                                                                                                                    | <i>thrXt</i>  | L-threonine                                        |
| <i>gys2</i>   | glycogen                                                                                                                                    | <i>trpXt</i>  | L-tryptophan                                       |
| <i>haaO</i>   | NAD <sup>+</sup> , NADH, NADP <sup>+</sup> , NADPH                                                                                          | <i>ugp2</i>   | glycogen                                           |
| <i>hisXt</i>  | histidine                                                                                                                                   | <i>valXt</i>  | valine                                             |
| <i>hmgCr</i>  | cholesterol                                                                                                                                 | <i>fdtT1</i>  | sphingomyelin                                      |
| <i>idi1</i>   | cholesterol                                                                                                                                 | <i>ebp</i>    | cardiolipin                                        |
| <i>ileXt</i>  | L-isoleucine                                                                                                                                | <i>afmId</i>  | sphingomyelin                                      |
| <i>khh</i>    | phosphatidylglycerol<br>phosphatidylserine<br>phosphatidylethanolamine<br>phosphatidylcholine<br>cardiolipin<br>1Phosphatidyl-D-myoinositol |               |                                                    |

**Table 6.** List of SL gene pairs for the CHO 1.2 model along with auxotrophy information

| Gene Pair               | Auxotrophy                                                                                                          | Gene Pair             | Auxotrophy                                                                                                                                                                                                                                       |
|-------------------------|---------------------------------------------------------------------------------------------------------------------|-----------------------|--------------------------------------------------------------------------------------------------------------------------------------------------------------------------------------------------------------------------------------------------|
| <i>asnS, asnXt</i>      | L-asparagine                                                                                                        | <i>pemT, slc5a7</i>   | sphingomyeline<br>phosphatidylcholine<br>cholesterol                                                                                                                                                                                             |
| <i>pbeF1, prpS2</i>     | NAD <sup>+</sup> , NADP <sup>+</sup> , NADPH                                                                        | <i>dhcR24, sc5D</i>   | 1Phosphatidyl-D-myoinositol                                                                                                                                                                                                                      |
| <i>pc3, ahcY11</i>      | phosphatidylcholine                                                                                                 | <i>isyNa1, ugtLa2</i> | sphingomyelin<br>phosphatidylserine<br>phosphatidylethanolamine<br>phosphatidylcholine<br>phosphatidylserine<br>phosphatidylethanolamine<br>phosphatidylserine<br>phosphatidylethanolamine<br>phosphatidylcholine<br>1Phosphatidyl-D-myoinositol |
| <i>pc4, slc5a7</i>      | sphingomyeline, phosphatidylcholine                                                                                 | <i>chkB, ptdSs1</i>   | 1Phosphatidyl-D-myoinositol                                                                                                                                                                                                                      |
| <i>ahcY11, slc5a7</i>   | sphingomyeline, phosphatidylcholine                                                                                 | <i>pc3, pc2</i>       | dTTP                                                                                                                                                                                                                                             |
| <i>pc3, pc4</i>         | phosphatidylcholine                                                                                                 | <i>impA2, mioX</i>    | 1Phosphatidyl-D-myoinositol                                                                                                                                                                                                                      |
| <i>txnd2, tr3</i>       | dATP, dGTP, dCTP, dTTP                                                                                              | <i>isyNa1, gusB</i>   | 1Phosphatidyl-D-myoinositol                                                                                                                                                                                                                      |
| <i>pc3, pcyT2</i>       | phosphatidylcholine<br>phosphatidylethanolamine<br>phosphatidylserine                                               | <i>polA1, tymS</i>    | 1Phosphatidyl-D-myoinositol                                                                                                                                                                                                                      |
| <i>pheXt, tyrXt</i>     | L-phenylalanine, L-tyrosine                                                                                         | <i>impA2, ugtLa2</i>  | 1Phosphatidyl-D-myoinositol                                                                                                                                                                                                                      |
| <i>pah, pheXt</i>       | L-phenylalanine                                                                                                     | <i>isyNa1, mioX</i>   | 1Phosphatidyl-D-myoinositol                                                                                                                                                                                                                      |
| <i>slc14a2, slc14a1</i> | spermidine, putrescine                                                                                              | <i>isyNa1, ugdH</i>   | sphingomyelin,<br>phosphatidylcholine<br>1Phosphatidyl-D-myoinositol                                                                                                                                                                             |
| <i>dhcR24, choL4</i>    | cholesterol                                                                                                         | <i>pc5, slc5a7</i>    | phosphatidylcholine                                                                                                                                                                                                                              |
| <i>qdpR, pheXt</i>      | L-phenylalanine                                                                                                     | <i>impA2, ugdH</i>    | cholesterol                                                                                                                                                                                                                                      |
| <i>pc3, chkB</i>        | phosphatidylcholine<br>phosphatidylethanolamine<br>phosphatidylserine<br>phosphatidylethanolamine<br>sphingomyeline | <i>pc3, pc5</i>       | phosphatidylcholine                                                                                                                                                                                                                              |
| <i>pc2, ptdSs1</i>      | sphingomyelin<br>phosphatidylserine<br>phosphatidylethanolamine<br>phosphatidylcholine                              | <i>choL4, sc5D</i>    | phosphatidylcholine                                                                                                                                                                                                                              |
| <i>fh1, sdhc</i>        | sphingomyelin                                                                                                       | <i>pc3, pemT</i>      | phosphatidylglycerol<br>phosphatidylserine<br>phosphatidylethanolamine<br>phosphatidylcholine<br>cardiolipin<br>1Phosphatidyl-D-myoinositol<br>NAD <sup>+</sup> , NADP <sup>+</sup> , NADPH                                                      |
| <i>chkA, chkB</i>       |                                                                                                                     | <i>cel, lpl</i>       |                                                                                                                                                                                                                                                  |
| <i>sdhD, sdhc</i>       |                                                                                                                     | <i>indOl, tdo2</i>    |                                                                                                                                                                                                                                                  |
| <i>ptdSs1, ptdSs2</i>   | phosphatidylserine<br>phosphatidylethanolamine<br>dTTP                                                              | <i>pcyT1a, pcyT1b</i> | sphingomyelin                                                                                                                                                                                                                                    |
| <i>dtyMk, polA1</i>     | 1Phosphatidyl-D-myoinositol                                                                                         | <i>pgm1, pgm2</i>     | glycogen                                                                                                                                                                                                                                         |
| <i>gusB, impA2</i>      | phosphatidylserine<br>phosphatidylethanolamine<br>phosphatidylcholine                                               |                       |                                                                                                                                                                                                                                                  |
| <i>pc3, ptdSs2</i>      |                                                                                                                     |                       |                                                                                                                                                                                                                                                  |

**Table 7.** List of higher order SL gene sets for the CHO 1.2 model along with auxotrophy information

|                           | Higher order SL-gene sets             | Auxotrophy                                                                                                                                                                            |
|---------------------------|---------------------------------------|---------------------------------------------------------------------------------------------------------------------------------------------------------------------------------------|
| Synthetic Lethal Triplets | <i>dhoDh , fh1 , cytB</i>             | <i>Sphingomyelin</i>                                                                                                                                                                  |
|                           | <i>ggh , pipOx , slc19a1</i>          | <i>5Methyltetrahydrofolate</i>                                                                                                                                                        |
|                           | <i>cox1 , dhoDh , sdhD</i>            | <i>Sphingomyelin</i>                                                                                                                                                                  |
|                           | <i>cox2 , dhoDh , sdhD</i>            | <i>Sphingomyelin</i>                                                                                                                                                                  |
|                           | <i>cox3 , dhoDh , sdhD</i>            | <i>Sphingomyelin</i>                                                                                                                                                                  |
|                           | <i>cox5a , dhoDh , sdhD</i>           | <i>Sphingomyelin</i>                                                                                                                                                                  |
|                           | <i>cox5b , dhoDh , sdhD</i>           | <i>Sphingomyelin</i>                                                                                                                                                                  |
|                           | <i>cox6c , dhoDh , sdhD</i>           | <i>Sphingomyelin</i>                                                                                                                                                                  |
|                           | <i>cox7b , dhoDh , sdhD</i>           | <i>Sphingomyelin</i>                                                                                                                                                                  |
|                           | <i>cox8a , dhoDh , sdhD</i>           | <i>Sphingomyelin</i>                                                                                                                                                                  |
|                           | <i>cox7c , dhoDh , sdhD</i>           | <i>Sphingomyelin</i>                                                                                                                                                                  |
|                           | <i>cox8b , dhoDh , sdhD</i>           | <i>Sphingomyelin</i>                                                                                                                                                                  |
|                           | <i>cox6a1 , dhoDh , sdhD</i>          | <i>Sphingomyelin</i>                                                                                                                                                                  |
|                           | <i>cox6a2 , dhoDh , sdhD</i>          | <i>Sphingomyelin</i>                                                                                                                                                                  |
|                           | <i>cox6b1 , dhoDh , sdhD</i>          | <i>Sphingomyelin</i>                                                                                                                                                                  |
|                           | <i>cox7a1 , dhoDh , sdhD</i>          | <i>Sphingomyelin</i>                                                                                                                                                                  |
|                           | <i>cox6b2 , dhoDh , sdhD</i>          | <i>Sphingomyelin</i>                                                                                                                                                                  |
|                           | <i>cox7a2 , dhoDh , sdhD</i>          | <i>Sphingomyelin</i>                                                                                                                                                                  |
|                           | <i>cox7b2 , dhoDh , sdhD</i>          | <i>Sphingomyelin</i>                                                                                                                                                                  |
|                           | <i>cox7a2l , dhoDh , sdhD</i>         | <i>Sphingomyelin</i>                                                                                                                                                                  |
| SL Quadruplets            | <i>nanS , npl , st8Sia1 , st8Sia5</i> | <i>N-Acetylneuraminate</i>                                                                                                                                                            |
|                           | <i>ak1 . ak2 , ak3L1 , cmpK1</i>      | <i>Phosphatidylglycerol</i><br><i>Phosphatidylserine</i><br><i>Phosphatidylethanolamine</i><br><i>Phosphatidylcholine</i><br><i>Cardiolipin</i><br><i>1Phosphatidyl-D-myoinositol</i> |
|                           | <i>polA1 , rrm1 , rrm2 , rrm2b</i>    | <i>dATP</i>                                                                                                                                                                           |
|                           |                                       |                                                                                                                                                                                       |



**Table 8.** List of gene members for the most important gene-hubs based on node centrality analysis

| Genes forming SL2 with <i>pc3</i>                                                                                      | Genes forming SL2 with <i>slc5a7</i>                     | Genes forming SL2 with <i>ptdSs1</i>                       | Genes forming SL2 with <i>isyNa1</i>                       | Genes forming SL2 with <i>chkB</i>         | Gene pair forming SL3 with <i>dhoDh</i> only | Genes forming SL3 with <i>sdhD</i> - <i>dhoDh</i> gene pair                                                                                                                                                                                                                                        |
|------------------------------------------------------------------------------------------------------------------------|----------------------------------------------------------|------------------------------------------------------------|------------------------------------------------------------|--------------------------------------------|----------------------------------------------|----------------------------------------------------------------------------------------------------------------------------------------------------------------------------------------------------------------------------------------------------------------------------------------------------|
| <i>ahcY11</i><br><i>pc4</i><br><i>pc5</i><br><i>pemT</i><br><i>pcyT2</i><br><i>pc2</i><br><i>chkB</i><br><i>ptdSs2</i> | <i>pc4</i><br><i>ahcY11</i><br><i>pemT</i><br><i>pc5</i> | <i>chkB</i><br><i>ptdSs2</i><br><i>pcyT2</i><br><i>pc2</i> | <i>ugdH</i><br><i>gusB</i><br><i>mioX</i><br><i>ugtLa2</i> | <i>pc3</i><br><i>chkA</i><br><i>ptdSs1</i> | <i>cytB-fh1</i>                              | <i>cox1</i><br><i>cox2</i><br><i>cox3</i><br><i>cox5a</i><br><i>cox5b</i><br><i>cox6c</i><br><i>cox7b</i><br><i>cox8a</i><br><i>cox8b</i><br><i>cox7c</i><br><i>cox6a1</i><br><i>cox6a2</i><br><i>cox6b1</i><br><i>cox7a1</i><br><i>cox6b2</i><br><i>cox7a2</i><br><i>cox7b2</i><br><i>cox7a2l</i> |

- Boles E, de Jong-Gubbels P, Pronk JT: **Identification and characterization of MAE1, the *Saccharomyces cerevisiae* structural gene encoding mitochondrial malic enzyme.** *Journal of bacteriology* 1998, **180**(11):2875-2882.
- Moreira dos Santos M, Raghevendran V, Kotter P, Olsson L, Nielsen J: **Manipulation of malic enzyme in *Saccharomyces cerevisiae* for increasing NADPH production capacity aerobically in different cellular compartments.** *Metabolic engineering* 2004, **6**(4):352-363.
- Suga H, Matsuda F, Hasunuma T, Ishii J, Kondo A: **Implementation of a transhydrogenase-like shunt to counter redox imbalance during xylose fermentation in *Saccharomyces cerevisiae*.** *Applied microbiology and biotechnology* 2013, **97**(4):1669-1678.
- Velazquez I, Pardo JP: **Kinetic characterization of the rotenone-insensitive internal NADH: ubiquinone oxidoreductase of mitochondria from *Saccharomyces cerevisiae*.** *Archives of biochemistry and biophysics* 2001, **389**(1):7-14.
- Dujon B: **Yeast evolutionary genomics.** *Nature reviews Genetics* 2010, **11**(7):512-524.
- Klingenberg M: **The ADP-ATP translocation in mitochondria, a membrane potential controlled transport.** *The Journal of membrane biology* 1980, **56**(2):97-105.
- Vozza A, Blanco E, Palmieri L, Palmieri F: **Identification of the mitochondrial GTP/GDP transporter in *Saccharomyces cerevisiae*.** *The Journal of biological chemistry* 2004, **279**(20):20850-20857.
- Alvarez-Vasquez F, Riezman H, Hannun YA, Voit EO: **Mathematical modeling and validation of the ergosterol pathway in *Saccharomyces cerevisiae*.** *PloS one* 2011, **6**(12):e28344.
- Zampar GG, Kummel A, Ewald J, Jol S, Niebel B, Picotti P, Aebersold R, Sauer U, Zamboni N, Heinemann M: **Temporal system-level organization of the switch from glycolytic to gluconeogenic operation in yeast.** *Molecular systems biology* 2013, **9**:651.
- Gascon S, Neumann NP, Lampen JO: **Comparative study of the properties of the purified internal and external invertases from yeast.** *The Journal of biological chemistry* 1968, **243**(7):1573-1577.
- Xu YF, Letisse F, Absalan F, Lu W, Kuznetsova E, Brown G, Caudy AA, Yakunin AF, Broach JR, Rabinowitz JD: **Nucleotide degradation and ribose salvage in yeast.** *Molecular systems biology* 2013, **9**:665.
