# Supplementary material for: Using Gene Essentiality and Synthetic Lethality Information to Correct Yeast and CHO Cell Genome-Scale Models
Source: MDPI journal article supplement (doi:10.3390/metabo5040536), 2015-09-29
Supplement: s1 [file s1]

**Supplemental File 6:**  
**Comparison of Mouse and CHO lethal gene sets**

**The SL pairs in mouse genome scale model (139 gene pairs)**

| GENE 1  | GENE2   | GENE1  | GENE2   | GENE1   | GENE2   | GENE1   | GENE2   |
|---------|---------|--------|---------|---------|---------|---------|---------|
| AAPR    | GPAT1   | FFAM06 | FFAM16  | MIPL    | UGDH    | PGLS    | TRALD   |
| ADSLa   | MTHFD1  | FFAM15 | FFB05   | MIPL    | UGT2B5  | PHEXT   | TYRXT   |
| ADSLa   | MTHFD2a | FFAM16 | FFB05   | MTHFD1  | PAICS   | POLA11  | RRM1    |
| ADSLa   | MTHFD2b | FFAM19 | FFB03   | MTHFD1  | PAICSa  | POLA13  | RRM2b   |
| ADSLa   | SLC26A6 | FFB01  | FFB47   | MTHFD1  | PFAS    | POLA14  | TMK     |
| AFMIDa  | AFMIDc  | FFB03  | FFE03   | MTHFD1  | PRPS2   | POLA14  | TYMS    |
| AFMIDc  | KYNUa   | FFB04  | FFB51   | MTHFD1  | PURH    | PRPS2   | SLC26A6 |
| AFMIDc  | KYNUb   | Fha    | MTHFD1  | MTHFD1  | PURHa   | PSS1    | PSS2    |
| AGPAT   | CELb    | Fha    | MTHFD2a | MTHFD2a | PAICS   | PURH    | SLC26A6 |
| AGPAT   | HIBCHb  | Fha    | MTHFD2b | MTHFD2a | PAICSa  | PURHa   | SLC26A6 |
| AGPAT   | HPG22   | Fha    | SLC26A6 | MTHFD2a | PFAS    | SDHC    | SUDCb   |
| AGPAT   | HPG33   | FHb    | SUDCb   | MTHFD2a | PRPS2   | SLC14A1 | SLC14A2 |
| ASNS    | ASNXT   | FTHFL  | MTHFD1  | MTHFD2a | PURH    | TR3b    | TXNRD2  |
| CBSa    | CYSXT   | FTHFL  | MTHFD2a | MTHFD2a | PURHa   |         |         |
| CBSa    | MTR     | FTHFL  | MTHFD2b | MTHFD2b | PAICS   |         |         |
| CHK     | CHKL    | FTHFL  | SLC26A6 | MTHFD2b | PAICSa  |         |         |
| CHOK    | PC3     | GARc   | MTHFD1  | MTHFD2b | PFAS    |         |         |
| CHOK    | PSS1    | GARc   | MTHFD2a | MTHFD2b | PRPS2   |         |         |
| CHOL4   | DHCR24b | GARc   | MTHFD2b | MTHFD2b | PURH    |         |         |
| CHOL4   | EBPa    | GARc   | SLC26A6 | MTHFD2b | PURHa   |         |         |
| CHOL4   | HPG09   | GARTa  | MTHFD1  | MTR     | MUTa    |         |         |
| CHOL4   | HPG10   | GARTa  | MTHFD2a | MTR     | PCCB    |         |         |
| CHOL4   | SC5D    | GARTa  | MTHFD2b | NADK    | NT5M6   |         |         |
| CHOL5   | DHCR24b | GARTa  | SLC26A6 | OGDH2   | SUDCb   |         |         |
| CHOL5   | EBPa    | GARTb  | MTHFD1  | OGDH3   | SUDCb   |         |         |
| CHOL5   | HPG09   | GARTb  | MTHFD2a | PAHb    | PHEXT   |         |         |
| CHOL5   | HPG10   | GARTb  | MTHFD2b | PAICS   | SLC26A6 |         |         |
| CHOL5   | SC5D    | GARTb  | SLC26A6 | PAICSa  | SLC26A6 |         |         |
| CTHc    | CYSXT   | GDC1   | GYK     | PBEF1   | RPPK    |         |         |
| CTHc    | MTR     | GPAT1  | GPAT2   | PC1     | PC3     |         |         |
| CYSOUT  | MTR     | GPD2   | RPE     | PC1     | PSS1    |         |         |
| CYSXT   | HPG25   | GPD2   | TKT     | PC2     | PC3     |         |         |
| CYSXT   | MUTa    | GPD2   | TKTa    | PC2     | PSS1    |         |         |
| CYSXT   | PCCB    | GPD2   | TRALD   | PC3     | PSS2    |         |         |
| DHCR24a | SC5D    | GUSBa  | IMPA2   | PFAS    | SLC26A6 |         |         |
| DHPR1   | PHEXT   | GUSBa  | MIPL    | PGD     | RPE     |         |         |
| DLST1   | SUDCb   | HMGCLa | MGCH    | PGD     | TKT     |         |         |
| FDFT1a  | FDFT1b  | HPG25  | MTR     | PGD     | TKTa    |         |         |
| FDFT1a  | FDFT1c  | IMPA2  | MIOX    | PGD     | TRALD   |         |         |
| FFAM04  | FFAM19  | IMPA2  | UGDH    | PGLS    | RPE     |         |         |
| FFAM04  | FFE03   | IMPA2  | UGT2B5  | PGLS    | TKT     |         |         |
| FFAM06  | FFAM15  | MIOX   | MIPL    | PGLS    | TKTa    |         |         |

Gene 1- Gene 2 refer to a synthetic lethal pair

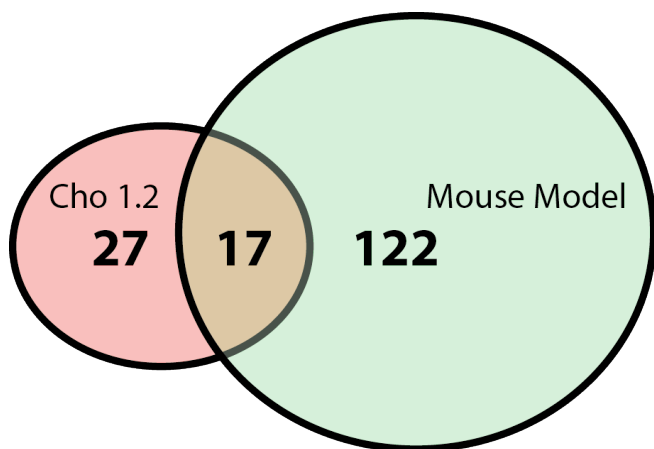

Figure: Overlap of mouse and CHO 1.2 synthetic lethal pairs

**Table: Showing the common SL pairs between CHO 1.2 and mouse GSM**

The SL pairs COMMON in mouse genome scale model and CHO 1.2

|                                                  | GENE 1         | GENE2          |
|--------------------------------------------------|----------------|----------------|
| Gene 1- Gene 2 refers to a synthetic lethal pair | <i>asnS</i>    | <i>asnXt</i>   |
|                                                  | <i>pheXt</i>   | <i>tyrXt</i>   |
|                                                  | <i>pah</i>     | <i>pheXt</i>   |
|                                                  | <i>ptdSs1</i>  | <i>ptdSs2</i>  |
|                                                  | <i>gusB</i>    | <i>impA2</i>   |
|                                                  | <i>pc3</i>     | <i>ptdSs2</i>  |
|                                                  | <i>dhcR24</i>  | <i>sc5D</i>    |
|                                                  | <i>pc3</i>     | <i>pc2</i>     |
|                                                  | <i>impA2</i>   | <i>mioX</i>    |
|                                                  | <i>polA1</i>   | <i>tymS</i>    |
|                                                  | <i>impA2</i>   | <i>ugdH</i>    |
|                                                  | <i>choL4</i>   | <i>sc5D</i>    |
|                                                  | <i>txnd2</i>   | <i>tr3</i>     |
|                                                  | <i>slc14a2</i> | <i>slc14a1</i> |
|                                                  | <i>dhcR24</i>  | <i>choL4</i>   |
|                                                  | <i>pc2</i>     | <i>ptdSs1</i>  |
|                                                  | <i>chkA</i>    | <i>chkB</i>    |
